# Supplementary material for: A Mixed-Methods Investigation of Facilitators to Accessing and Utilising Mental Health Services amongst Sri Lankan Australians
Source: MDPI journal article supplement (doi:10.3390/ijerph20075425), 2023-04-06
Supplement: s1 [file s1]

# A Mixed-Methods Investigation of Facilitators to Accessing and Utilising Mental Health Services amongst Sri Lankan Australians

Amanda Daluwatta, Kathryn Fletcher, Chris Ludlow, Ariane Virgona & Greg Murray

## Supplementary material

**Table S1.** The proportion of the Sri Lankan Australian sample endorsing Facilitator Set items and the mean score for each item ( $N = 262$ )

| Item number/ Facilitator                                                                                          | % (n)      |           |             |            | Mean (Std. Deviation) |
|-------------------------------------------------------------------------------------------------------------------|------------|-----------|-------------|------------|-----------------------|
|                                                                                                                   | Not at all | A Little  | Quite a Lot | A Lot      |                       |
| <b>1</b> Having interpreters and translation services available                                                   | 36.6 (96)  | 13.7 (36) | 16.8 (44)   | 32.8 (86)  | 1.46 (1.28)           |
| <b>2</b> Having positive past experiences with help-seeking                                                       | 3.8 (10)   | 9.2 (24)  | 26.3 (69)   | 60.7 (159) | 2.44 (0.81)           |
| <b>3</b> Reading about positive results of help-seeking                                                           | 3.8 (10)   | 10.3 (27) | 31.3 (82)   | 54.6 (143) | 2.37 (0.82)           |
| <b>4</b> Having social support or encouragement from family and friends                                           | 2.3 (6)    | 5.3 (14)  | 23.7 (62)   | 68.7 (180) | 2.59 (0.70)           |
| <b>5</b> Having trust in the provider and their confidentiality processes                                         | 1.9 (5)    | 5.0 (13)  | 19.8 (52)   | 73.3 (192) | 2.65 (0.67)           |
| <b>6</b> Having positive relationships with mental health professionals                                           | 0.8 (2)    | 6.9 (18)  | 21.0 (55)   | 71.4 (187) | 2.63 (0.65)           |
| <b>7</b> Being provided with education about the available services                                               | 2.3 (6)    | 9.5 (25)  | 27.9 (73)   | 60.3 (158) | 2.46 (0.76)           |
| <b>8</b> Perceiving the mental health problem as serious                                                          | 3.1 (8)    | 8.0 (21)  | 23.3 (61)   | 65.6 (172) | 2.52 (0.77)           |
| <b>9</b> The community having positive attitudes towards seeking help                                             | 2.7 (7)    | 8.0 (21)  | 15.6 (41)   | 73.7 (193) | 2.60 (0.75)           |
| <b>10</b> Having a compatriot (i.e. someone with lived experience of the mental illness)                          | 4.2 (11)   | 13.7 (36) | 30.9 (81)   | 51.1 (134) | 2.29 (0.86)           |
| <b>11</b> Being provided with more mental health literacy                                                         | 5.0 (13)   | 13.4 (35) | 24.8 (65)   | 56.9 (149) | 2.34 (0.89)           |
| <b>12</b> Being provided with culturally appropriate mental health interventions that are sensitive to my culture | 12.6 (33)  | 9.5 (25)  | 22.1 (58)   | 55.7 (146) | 2.21 (1.06)           |
| <b>13</b> Having a dual-culture practitioner, that is a professional who has the same ethnicity as me             | 18.3 (48)  | 13.7 (36) | 23.7 (62)   | 44.3 (116) | 1.94 (1.15)           |
| <b>14</b> Being provided with online adjuncts to traditional approaches                                           | 20.6 (54)  | 26.0 (68) | 26.7 (70)   | 26.7 (70)  | 1.60 (1.09)           |
| <b>15</b> Being provided with mental health information in Sinhalese or Tamil etc.                                | 30.5 (80)  | 15.3 (40) | 15.6 (41)   | 38.5 (101) | 1.62 (1.27)           |
| <b>16</b> Including my family in the therapeutic process                                                          | 25.2 (66)  | 28.2 (74) | 21.4 (56)   | 25.2 (66)  | 1.47 (1.12)           |
| <b>17</b> Reducing stigma beliefs held within the community                                                       | 7.3 (19)   | 5.7 (15)  | 16.8 (44)   | 70.2 (184) | 2.50 (0.90)           |
| <b>18</b> Incorporating my religious beliefs into therapy                                                         | 35.1 (92)  | 23.7 (62) | 19.8 (52)   | 21.4 (56)  | 1.27 (1.16)           |

Note: 'Not at all' = 0; 'a little' = 1; 'quite a lot' = 2; 'a lot' = 3

# A Mixed-Methods Investigation of Facilitators to Accessing and Utilising Mental Health Services amongst Sri Lankan Australians

Amanda Daluwatta, Kathryn Fletcher, Chris Ludlow, Ariane Virgona & Greg Murray

**Table S2.** The proportion of the Sri Lankan Australian sample endorsing Intervention Set items and the mean score for each item ( $N = 262$ )

| Item number/ Recommendation                                                                                                                               | % (n)      |           |             |            | Mean (Std. Deviation) |
|-----------------------------------------------------------------------------------------------------------------------------------------------------------|------------|-----------|-------------|------------|-----------------------|
|                                                                                                                                                           | Not at all | A Little  | Quite a Lot | A Lot      |                       |
| <b>1</b> Raising community awareness of mental health conditions                                                                                          | 0.4 (1)    | 5.7 (15)  | 14.9 (39)   | 79.0 (207) | 2.73 (0.58)           |
| <b>2</b> Providing the community with psychoeducation workshops or “group talks”                                                                          | 5.0 (13)   | 12.6 (33) | 23.7 (62)   | 58.8 (154) | 2.36 (0.89)           |
| <b>3</b> A screening tool that assess symptoms of depression that are specific to Sri Lankan Australians                                                  | 3.8 (10)   | 9.5 (25)  | 24.0 (63)   | 62.6 (164) | 2.45 (0.82)           |
| <b>4</b> A website that contains depression literacy, psychoeducation, and debunks myths held within the Sri Lankan Australian community about depression | 3.8 (10)   | 12.2 (32) | 21.4 (56)   | 62.6 (164) | 2.43 (0.85)           |
| <b>5</b> Pamphlets providing depression information specific to the Sri Lankan Australian community                                                       | 4.6 (12)   | 20.2 (53) | 26.3 (69)   | 48.9 (128) | 2.19 (0.92)           |
| <b>6</b> Guidelines for health professionals working with Sri Lankan Australians who have depression                                                      | 4.6 (12)   | 10.3 (27) | 21.0 (55)   | 64.1 (168) | 2.45 (0.86)           |
| <b>7</b> A public stigma reduction intervention                                                                                                           | 2.3 (6)    | 8.4 (22)  | 15.6 (41)   | 73.7 (193) | 2.61 (0.74)           |

*Note:* ‘Not at all’ = 0; ‘a little’ = 1; ‘quite a lot’ = 2; ‘a lot’ = 3
